# Supplementary material for: Suppression of phosphine-protected Au9 cluster agglomeration on SrTiO3 particles using a chromium hydroxide layer
Source: Royal Society of Chemistry journal article supplement (doi:10.1039/d1ma01226f), 2022-01-01
Supplement: d1ma01226f1.pdf [file d1ma01226f1.pdf]

**Supporting Information for:**  
**Suppression of Phosphine-Protected Au<sub>9</sub> Clusters Agglomeration on SrTiO<sub>3</sub>**  
**Particles Using a Chromium Hydroxide Layer**

Abdulrahman S. Alotabi <sup>1,2,3</sup>, D. J. Osborn<sup>4</sup>, Yuki Kataoka<sup>5</sup>, Shuhei Ozaki<sup>5</sup>, Yuichi Negishi<sup>5</sup>,  
Siriluck Tesana<sup>6</sup>,  
Gregory F. Metha<sup>4</sup> and Gunther G. Andersson<sup>1,3\*</sup>

<sup>1</sup> Flinders Institute for Nanoscale Science and Technology, Flinders University, Adelaide, South Australia 5042, Australia

<sup>2</sup> Department of Physics, Faculty of Science and Arts in Baljurashi, Albaha University, Baljurashi 65655, Saudi Arabia

<sup>3</sup> Flinders Microscopy and Microanalysis, College of Science and Engineering, Flinders University, 5042 Adelaide, Australia

<sup>4</sup> Department of Chemistry, University of Adelaide, Adelaide, South Australia 5005, Australia

<sup>5</sup> Department of Applied Chemistry, Faculty of Science, Tokyo University of Science, 1-3 Kagurazaka, Shinjuku-ku, Tokyo 162-8601, Japan

<sup>6</sup> The MacDiarmid Institute for Advanced Materials and Nanotechnology, School of Physical and Chemical Sciences, University of Canterbury, Christchurch 8141, New Zealand

**Analytical Methods:**

- X-ray diffraction (XRD)

XRD patterns were recorded with an irradiation source of Co-K $\alpha$  ( $\lambda = 1.789 \text{ \AA}$ ) at 35 kV and 28 mA using a Bruker D8 diffractometer over a  $2\theta$  range of  $20^\circ$  to  $60^\circ$ .

**ADDITIONAL FIGURES**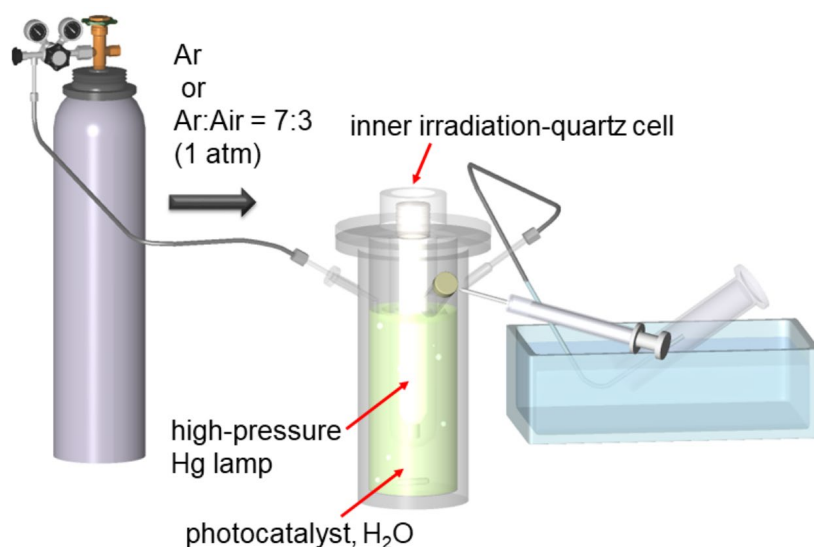

**Scheme S1:** Schematic of the measurement of the photocatalytic activity in this study. Ref. <sup>1</sup>.

Copyright 2018 American Chemical Society.

Figure S1 shows the Sr 3d and P 2p spectra of SrTiO<sub>3</sub> and SrTiO<sub>3</sub>-Au<sub>9</sub> before and after heating. The Sr 3d<sub>5/3</sub> peak for SrTiO<sub>3</sub> appeared at a binding energy of 133.6 eV. The significant intensity of the Sr 3d peak overlapped with the P 2p region, which meant that it was more difficult to fit and determine the chemical state of triphenylphosphine ligands.

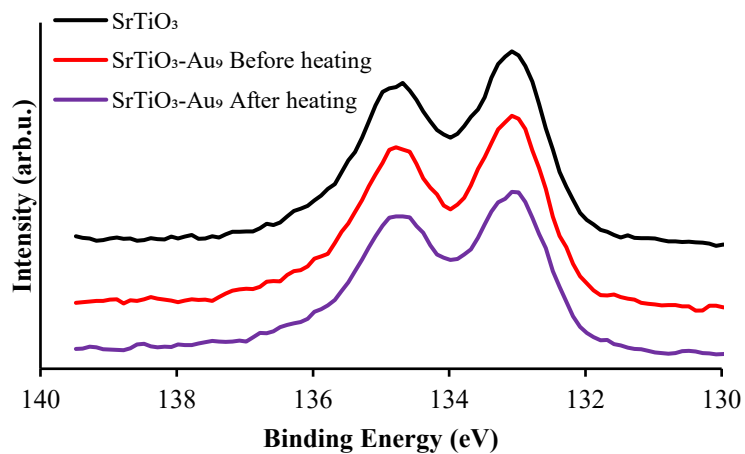

**Figure S1:** XPS Sr 3d and P 2p spectra of SrTiO<sub>3</sub> and SrTiO<sub>3</sub>-Au<sub>9</sub> before and after heating

## Effect of high-energy STEM electron beam irradiation on Au<sub>9</sub> clusters.

Figure S2 shows HAADF-STEM images after successive EDX elemental mapping measurements. These images show the effect of the high-energy STEM electron beam on the Au<sub>9</sub> clusters at the surface. Drift and agglomeration of Au<sub>9</sub> clusters were observed; the former is attributed to heating of the sample and the latter to beam damage. This effect must be considered for the size analysis of Au clusters from STEM-HAADF and the STEM EDX elemental mapping data.

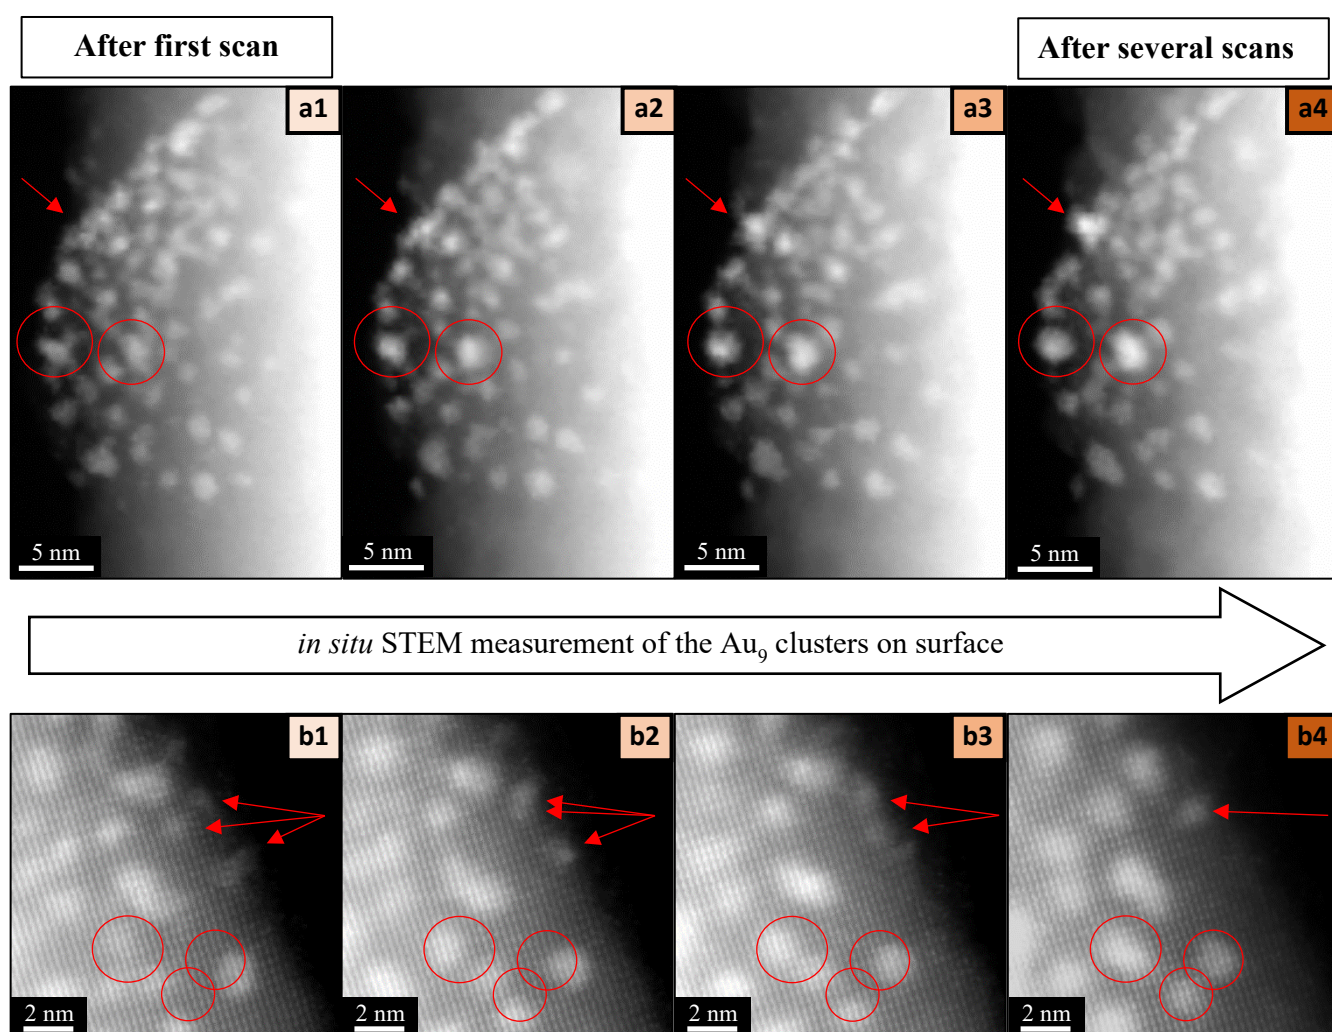

**Figure S2:** HAADF-STEM images of *in situ* STEM measurements of the Au<sub>9</sub> clusters on SrTiO<sub>3</sub>-Au<sub>9</sub>-Cr(OH)<sub>3</sub> before heating (a and b). The images display after the first and several scans with red circles and arrows indicated the clusters damaged by the STEM electron beam.

Figure S3 shows the Ba 3d spectrum of SrTiO<sub>3</sub>-Au<sub>9</sub> after heating. The binding energy of Ba 3d<sub>5/2</sub> appears at  $780.5 \pm 0.2$  eV corresponding to Ba metal. The presence of barium in the SrTiO<sub>3</sub>-Au<sub>9</sub>

sample due to the commercial contamination of  $\text{SrTiO}_3$  (99%, Sigma-Aldrich). Using XPS relative intensity, the amount of barium contamination is approximately  $< 1\%$ .

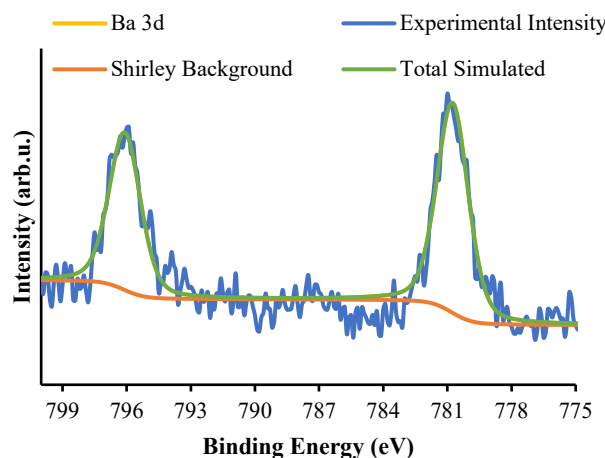

**Figure S3:** XPS Ba 3d spectrum of  $\text{SrTiO}_3\text{-Au}_9$  after heating.

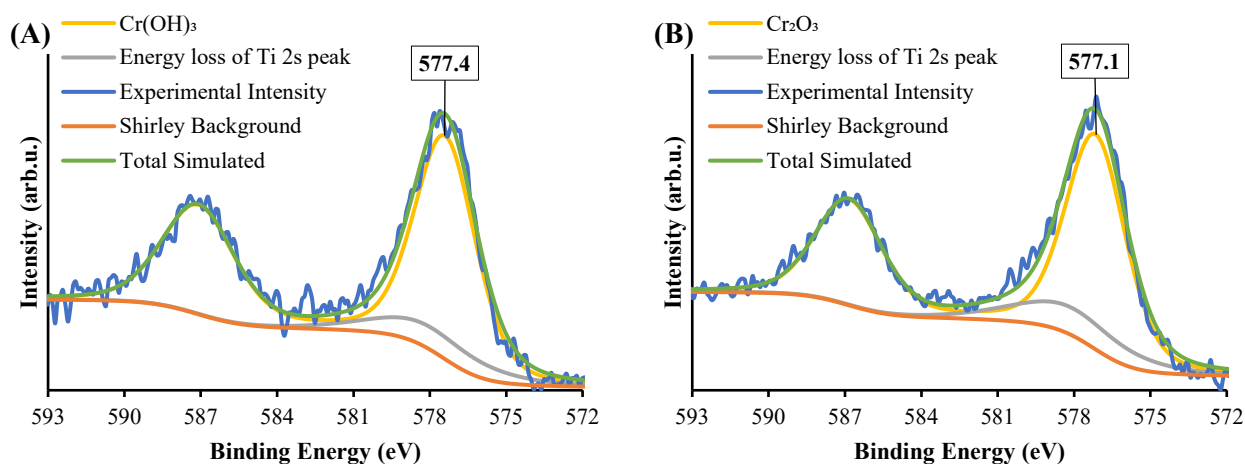

**Figure S4:** XPS Cr 2p spectra of (A)  $\text{SrTiO}_3\text{-Au}_9$  after photodeposition of a  $\text{CrO}_x$  layer and (B) after heating.

Figure S5 shows the  $\text{H}_2$  production after 1 h irradiation using 10% methanol as a sacrificial reagent under two conditions: (1) using Ar gas flow during the irradiation (without  $\text{O}_2$ ) and (2) using Ar gas and air (7:3) mixture flow during the irradiation (with  $\text{O}_2$ ) to investigate the back reaction process. For  $\text{SrTiO}_3$  and  $\text{SrTiO}_3\text{-Au}_9$ , the level of  $\text{H}_2$  production reduced by a factor of two after introducing air into the reactor. This was due to the recombination of  $\text{H}_2$  and  $\text{O}_2$  (from air) to water, which reduces the  $\text{H}_2$  evaluation reaction. For  $\text{SrTiO}_3\text{-Au}_9$  with a  $\text{Cr(OH)}_3$  layer, the level of  $\text{H}_2$  production did not

show a significant reduction after introducing air into the reactor, which indicated that  $\text{Cr}(\text{OH})_3$  inhibited the back reaction.

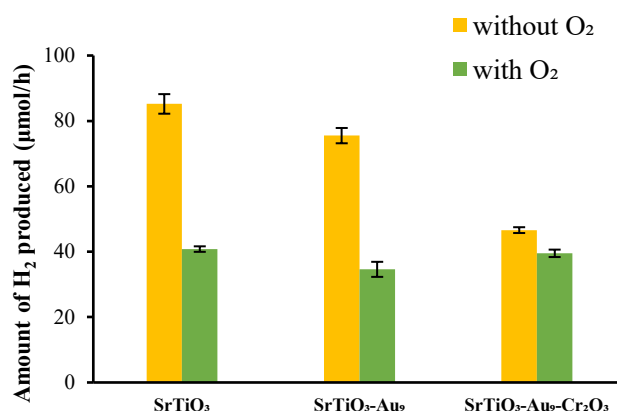

**Figure S5:** Comparison of the  $\text{H}_2$  evolution reactions of  $\text{SrTiO}_3$ ,  $\text{SrTiO}_3\text{-Au}_9$  and  $\text{SrTiO}_3\text{-Au}_9\text{-Cr}(\text{OH})_3$  using 10% methanol as a sacrificial reagent under flow of Ar gas (without  $\text{O}_2$ ) and flow of Ar and air 7:3 mixture (i.e. with  $\text{O}_2$ ). The values are average of two hours irradiation.

**Table S1:** XPS Au  $4f_{7/2}$  peak positions, full width at half maximum (FWHM) and relative HBP:LBP intensities with the size of Au features from STEM.

|     | SrTiO <sub>3</sub> -Au <sub>9</sub> |           |             |                                   | SrTiO <sub>3</sub> -Au <sub>9</sub> -Cr(OH) <sub>3</sub> |           |             |                                   |
|-----|-------------------------------------|-----------|-------------|-----------------------------------|----------------------------------------------------------|-----------|-------------|-----------------------------------|
|     | Peak position (eV)                  | FWHM      | Intensity % | HAADF-STEM<br>Size of Au features | Peak position (eV)                                       | FWHM      | Intensity % | HAADF-STEM<br>Size of Au features |
|     | Before heating                      |           |             |                                   |                                                          |           |             |                                   |
| HBP | 84.8 ± 0.2                          | 1.8 ± 0.2 | 83          | 0.7–1.3 nm                        | 85.0 ± 0.2                                               | 1.9 ± 0.2 | 90          | 1.3–1.6 nm                        |
| LBP | 84.1 ± 0.2                          | 1.2 ± 0.2 | 17          |                                   | 84.1 ± 0.2                                               | 1.2 ± 0.2 | 10          |                                   |
|     | After heating                       |           |             |                                   |                                                          |           |             |                                   |
| HBP | 85.4 ± 0.2                          | 2.0 ± 0.2 | 50          | -                                 | 84.9 ± 0.2                                               | 2.0 ± 0.2 | 65          | -                                 |
| LBP | 83.7 ± 0.2                          | 1.2 ± 0.2 | 50          |                                   | 83.8 ± 0.2                                               | 1.2 ± 0.2 | 35          |                                   |
|     | After 7 h irradiation               |           |             |                                   |                                                          |           |             |                                   |
| HBP | 85.2 ± 0.2                          | 2.2 ± 0.2 | 30          | 3.9–6.9 nm                        | 84.9 ± 0.2                                               | 2.2 ± 0.2 | 63          | 1.4–2.7 nm                        |
| LBP | 83.5 ± 0.2                          | 1.2 ± 0.2 | 70          |                                   | 83.9 ± 0.2                                               | 1.2 ± 0.2 | 37          |                                   |

**Table S2:** XPS peak positions of  $\text{SrTiO}_3\text{-Au}_9$  and  $\text{SrTiO}_3\text{-Au}_9$  after photodeposition of a  $\text{Cr}(\text{OH})_3$  layer.

| Sample \ Element                                        | C 1s |       |       | Au 4f <sub>7/2</sub> |      | Sr 3d <sub>5/2</sub> | Ti 2p <sub>3/2</sub> | O 1s  |       | Ba 3d <sub>5/2</sub> | Cr 2p <sub>3/2</sub> |
|---------------------------------------------------------|------|-------|-------|----------------------|------|----------------------|----------------------|-------|-------|----------------------|----------------------|
|                                                         | P1   | P2    | P3    | HBP                  | LBP  | P1                   | P1                   | P1    | P2    | P1                   | P1                   |
| <b>SrTiO<sub>3</sub>-Au<sub>9</sub></b>                 |      |       |       |                      |      |                      |                      |       |       |                      |                      |
| Before heating                                          | 285  | 286.0 | ---   | 84.8                 | 84.1 | 133.0                | 458.6                | 531.8 | 529.7 | 780.3                | ---                  |
| After heating                                           | 285  | 285.7 | 290.7 | 85.4                 | 83.7 | 133.3                | 458.8                | 531.8 | 529.9 | 780.5                | ---                  |
| After photocatalysis                                    | 285  | 285.8 | 290.1 | 85.2                 | 83.5 | 133.2                | 458.7                | 531.6 | 529.9 | 780.5                | ---                  |
| <b>SrTiO<sub>3</sub>-Au<sub>9</sub>-CrO<sub>x</sub></b> |      |       |       |                      |      |                      |                      |       |       |                      |                      |
| Before heating                                          | 285  | 286.4 | 289.8 | 85.0                 | 84.1 | 133.0                | 458.5                | 531.6 | 529.7 | 780.4                | 577.4                |
| After heating                                           | 285  | 290.5 | ---   | 84.9                 | 83.8 | 133.1                | 458.6                | 531.4 | 529.8 | 780.1                | 577.1                |
| After photocatalysis                                    | 285  | 285.7 | 289.8 | 84.9                 | 83.9 | 133.2                | 458.7                | 531.5 | 529.9 | 780.4                | 577.5                |

\* P1: Peak 1

\*\*HBP: High binding peak. LBP: Low binding peak

**Table S3:** XPS elemental composition of  $\text{SrTiO}_3\text{-Au}_9$  and  $\text{SrTiO}_3\text{-Au}_9$  after photodeposition of a  $\text{Cr}(\text{OH})_3$  layer.

| Sample \ Element                                        | C 1s  |      |      | Au 4f <sub>7/2</sub> |      | Sr 3d <sub>5/2</sub> | Ti 2p <sub>3/2</sub> | O 1s  |       | Ba 3d <sub>5/2</sub> | Cr 2p <sub>3/2</sub> |
|---------------------------------------------------------|-------|------|------|----------------------|------|----------------------|----------------------|-------|-------|----------------------|----------------------|
|                                                         | P1    | P2   | P3   | HBP                  | LBP  | P1                   | P1                   | P1    | P2    | P1                   | P1                   |
| <b>SrTiO<sub>3</sub>-Au<sub>9</sub></b>                 |       |      |      |                      |      |                      |                      |       |       |                      |                      |
| Before heating                                          | 10.81 | 2.15 | ---  | 0.54                 | 0.11 | 12.32                | 13.48                | 23.77 | 36.58 | 0.24                 | ---                  |
| After heating                                           | 7.12  | 2.50 | 1.01 | 0.17                 | 0.17 | 13.10                | 13.62                | 23.36 | 38.47 | 0.47                 | ---                  |
| After photocatalysis                                    | 6.31  | 2.37 | 1.09 | 0.07                 | 0.16 | 14.28                | 14.09                | 19.12 | 41.96 | 0.56                 | ---                  |
| <b>SrTiO<sub>3</sub>-Au<sub>9</sub>-CrO<sub>x</sub></b> |       |      |      |                      |      |                      |                      |       |       |                      |                      |
| Before heating                                          | 8.78  | 2.01 | 1.22 | 0.21                 | 0.02 | 10.59                | 10.66                | 31.33 | 29.42 | 0.35                 | 5.41                 |
| After heating                                           | 6.97  | 1.36 | ---  | 0.13                 | 0.07 | 11.99                | 12.02                | 28.19 | 33.97 | 0.24                 | 5.06                 |
| After photocatalysis                                    | 5.64  | 3.85 | 0.54 | 0.12                 | 0.07 | 11.72                | 10.86                | 31.47 | 30.39 | 0.20                 | 5.15                 |

\* P1: Peak 1

\*\*HBP: High binding peak. LBP: Low binding peak

**Table S4:** Summary of Cr 2p<sub>3/2</sub> peak position of various samples.

| Sample                                                                                                          | Cr 2p <sub>3/2</sub> peak position (eV) |
|-----------------------------------------------------------------------------------------------------------------|-----------------------------------------|
| Cr <sub>2</sub> O <sub>3</sub>                                                                                  | 576.9 ± 0.2                             |
| Cr(OH) <sub>3</sub>                                                                                             | 577.5 ± 0.2                             |
| SrTiO <sub>3</sub> -Cr(OH) <sub>3</sub>                                                                         | 577.6 ± 0.2                             |
| SrTiO <sub>3</sub> -Au <sub>9</sub> -Cr(OH) <sub>3</sub>                                                        | 577.4 ± 0.2                             |
| SrTiO <sub>3</sub> -Au <sub>9</sub> -Cr <sub>2</sub> O <sub>3</sub> heated                                      | 577.1 ± 0.2                             |
| SrTiO <sub>3</sub> -Au <sub>9</sub> -Cr(OH) <sub>3</sub> after 7 h irradiation                                  | 577.5 ± 0.2                             |
| SrTiO <sub>3</sub> -Au <sub>9</sub> -Cr <sub>2</sub> O <sub>3</sub> after irradiation (without O <sub>2</sub> ) | 577.5 ± 0.2                             |
| SrTiO <sub>3</sub> -Au <sub>9</sub> -Cr <sub>2</sub> O <sub>3</sub> after irradiation (with O <sub>2</sub> )    | 577.5 ± 0.2                             |

XPS Au 4f spectra of SrTiO<sub>3</sub>-Au<sub>9</sub> and SrTiO<sub>3</sub>-Au<sub>9</sub>-Cr(OH)<sub>3</sub> after irradiation during water splitting reaction for without O<sub>2</sub> and with O<sub>2</sub> samples are shown in Figure S6. Table S5 showed a summary of the Au 4f peak positions and FWHM. A full elemental composition analyses and peak positions are presented in Tables S6 and S7. The Au 4f spectrum for SrTiO<sub>3</sub>-Au<sub>9</sub> without O<sub>2</sub> was fitted with 59% of the intensity at HBP (84.9 ± 0.2 eV with an FWHM of 2.0 ± 0.2 eV) corresponding to Au clusters and 41% agglomerated clusters at LBP (83.6 ± 0.2 eV with an FWHM of 1.2 ± 0.2 eV) (Figure S6A). As shown in Figure S6B, for SrTiO<sub>3</sub>-Au<sub>9</sub> with O<sub>2</sub>, the Au 4f spectrum was fitted with 26% and 74% at HBP(84.9 ± 0.2 eV with an FWHM of 2.0 ± 0.2 eV) and LBP (83.5 ± 0.2 eV with an FWHM of 1.2 ± 0.2 eV), which represented the non-agglomerated and agglomerated clusters. In Figure S6C, the HBP and LBP of Au 4f<sub>7/2</sub> SrTiO<sub>3</sub>-Au<sub>9</sub>-Cr(OH)<sub>3</sub> without O<sub>2</sub> were observed at 85.1 ± 0.2 eV (62%) and 84.0 ± 0.2 eV (38%) with an FWHM of 2.0 ± 0.2 eV and 1.2 ± 0.2 eV, respectively. In Figure S6D, with O<sub>2</sub>, the HBP and LBP were observed at 84.9 ± 0.2 eV (55%) and 83.9 ± 0.2 eV (45%) with an FWHM of 2.0 ± 0.2 eV and 1.2 ± 0.2 eV, respectively. In SrTiO<sub>3</sub>-Au<sub>9</sub>-Cr(OH)<sub>3</sub> catalyst, more than a half of the Au clusters were stable at the surface of SrTiO<sub>3</sub> in the present experiment (without and with O<sub>2</sub>). This demonstrated that the Cr(OH)<sub>3</sub> helped inhibit the agglomeration of Au<sub>9</sub> clusters during the water splitting reaction with a sacrificial reagent (10% methanol).

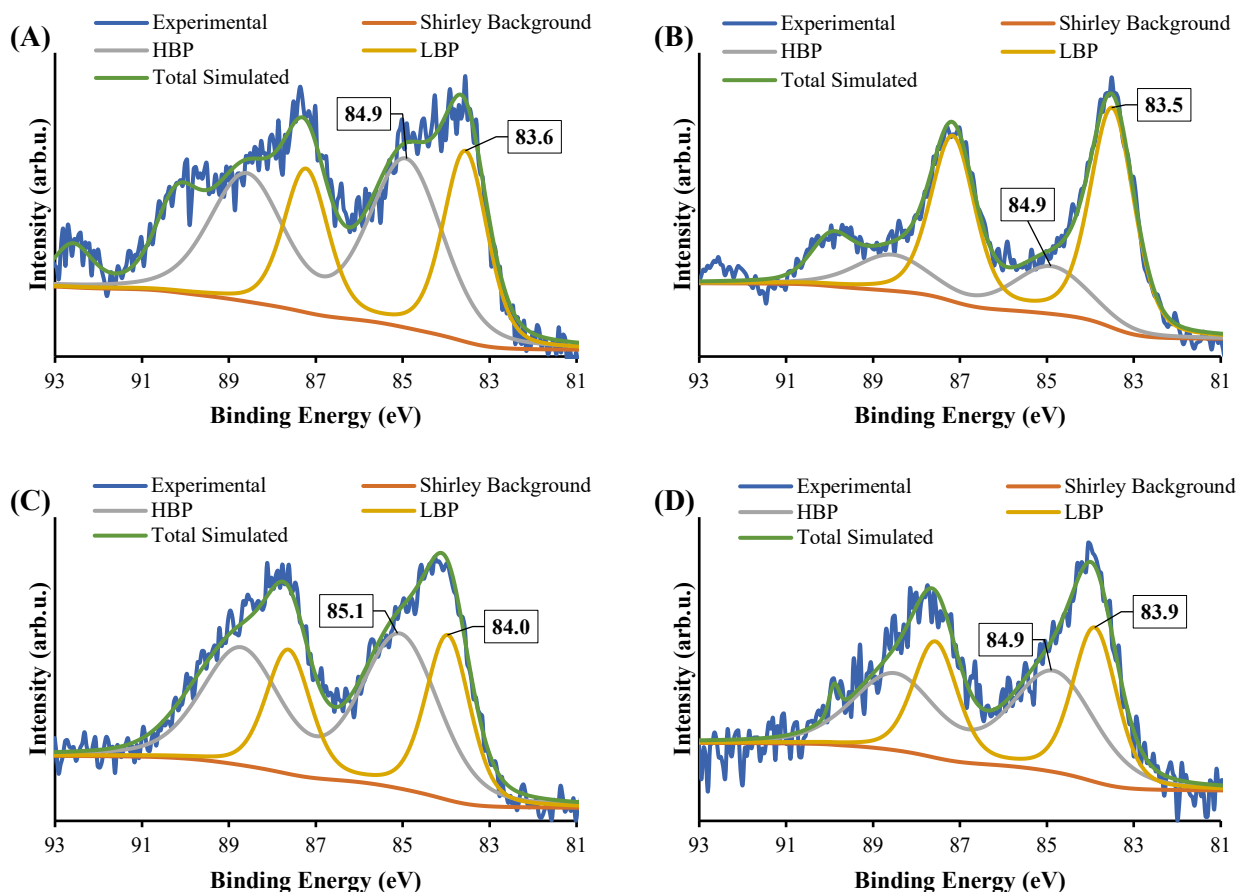

**Figure S6:** XPS spectra of Au 4f of SrTiO<sub>3</sub>-Au<sub>9</sub> after photocatalytic water-splitting reaction with (A) 10% CH<sub>3</sub>OH (without O<sub>2</sub>), and (B) 10% CH<sub>3</sub>OH + (7:3 Ar:air) mixture (with O<sub>2</sub>). (C) SrTiO<sub>3</sub>-Au<sub>9</sub>-Cr(OH)<sub>3</sub> after photocatalytic water-splitting reaction with 10% CH<sub>3</sub>OH (without O<sub>2</sub>), and (D) 10% CH<sub>3</sub>OH + (7:3 Ar:air) mixture (with O<sub>2</sub>).

**Table S5:** XPS Au 4f<sub>7/2</sub> peak positions, FWHM and relative HBP:LBP intensities.

|     | SrTiO <sub>3</sub> -Au <sub>9</sub>            |           |             | SrTiO <sub>3</sub> -Au <sub>9</sub> -Cr(OH) <sub>3</sub> |           |             |
|-----|------------------------------------------------|-----------|-------------|----------------------------------------------------------|-----------|-------------|
|     | Peak position (eV)                             | FWHM      | Intensity % | Peak position (eV)                                       | FWHM      | Intensity % |
|     | After photocatalysis (without O <sub>2</sub> ) |           |             |                                                          |           |             |
| HBP | 84.9 ± 0.2                                     | 2.0 ± 0.2 | 59          | 85.1 ± 0.2                                               | 2.1 ± 0.2 | 62          |
| LBP | 83.6 ± 0.2                                     | 1.2 ± 0.2 | 41          | 84.0 ± 0.2                                               | 1.2 ± 0.2 | 38          |
|     | After photocatalysis (with O <sub>2</sub> )    |           |             |                                                          |           |             |
| HBP | 84.9 ± 0.2                                     | 2.0 ± 0.2 | 26          | 84.9 ± 0.2                                               | 2.2 ± 0.2 | 55          |
| LBP | 83.5 ± 0.2                                     | 1.2 ± 0.2 | 74          | 83.9 ± 0.2                                               | 1.2 ± 0.2 | 45          |

**Table S6:** XPS peak positions of  $\text{SrTiO}_3\text{-Au}_9$  and  $\text{SrTiO}_3\text{-Au}_9$  after photodeposition of a  $\text{Cr}(\text{OH})_3$  layer.

| Sample \ Element                                        | C 1s |       |       | Au 4f <sub>7/2</sub> |      | Sr 3d <sub>5/2</sub> | Ti 2p <sub>3/2</sub> | O 1s  |       | Ba 3d <sub>5/2</sub> | Cr 2p <sub>3/2</sub> |
|---------------------------------------------------------|------|-------|-------|----------------------|------|----------------------|----------------------|-------|-------|----------------------|----------------------|
|                                                         | P1   | P2    | P3    | HBP                  | LBP  | P1                   | P1                   | P1    | P2    | P1                   | P1                   |
| <b>SrTiO<sub>3</sub>-Au<sub>9</sub></b>                 |      |       |       |                      |      |                      |                      |       |       |                      |                      |
| After photocatalysis (without O <sub>2</sub> )          | 285  | 286.1 | ---   | 84.9                 | 83.6 | 134.8                | 460.3                | 533.1 | 531.4 | 781.8                | ---                  |
| After photocatalysis (with O <sub>2</sub> )             | 285  | 285.6 | 290.4 | 84.9                 | 83.5 | 133.3                | 458.8                | 531.6 | 530.0 | 780.5                | ---                  |
| <b>SrTiO<sub>3</sub>-Au<sub>9</sub>-CrO<sub>x</sub></b> |      |       |       |                      |      |                      |                      |       |       |                      |                      |
| After photocatalysis (without O <sub>2</sub> )          | 285  | 285.7 | ---   | 85.1                 | 84.0 | 133.2                | 458.8                | 531.7 | 529.9 | 780.4                | 755.5                |
| After photocatalysis (with O <sub>2</sub> )             | 285  | 285.9 | 289.5 | 84.9                 | 83.9 | 133.2                | 458.8                | 531.7 | 529.9 | 780.3                | 577.5                |

\* P1: Peak 1

\*\*HBP: High binding peak. LBP: Low binding peak

**Table S7:** XPS elemental composition of  $\text{SrTiO}_3\text{-Au}_9$  and  $\text{SrTiO}_3\text{-Au}_9$  after photodeposition of a  $\text{Cr}(\text{OH})_3$  layer.

| Sample \ Element                                        | C 1s |      |      | Au 4f <sub>7/2</sub> |      | Sr 3d <sub>5/2</sub> | Ti 2p <sub>3/2</sub> | O 1s  |       | Ba 3d <sub>5/2</sub> | Cr 2p <sub>3/2</sub> |
|---------------------------------------------------------|------|------|------|----------------------|------|----------------------|----------------------|-------|-------|----------------------|----------------------|
|                                                         | P1   | P2   | P3   | HBP                  | LBP  | P1                   | P1                   | P1    | P2    | P1                   | P1                   |
| <b>SrTiO<sub>3</sub>-Au<sub>9</sub></b>                 |      |      |      |                      |      |                      |                      |       |       |                      |                      |
| After photocatalysis (without O <sub>2</sub> )          | 5.20 | 0.27 | ---  | 0.19                 | 0.13 | 15.08                | 14.87                | 17.16 | 46.51 | 0.60                 | ---                  |
| After photocatalysis (with O <sub>2</sub> )             | 4.37 | 6.08 | 0.74 | 0.07                 | 0.20 | 13.99                | 14.29                | 19.92 | 39.91 | 0.43                 | ---                  |
| <b>SrTiO<sub>3</sub>-Au<sub>9</sub>-CrO<sub>x</sub></b> |      |      |      |                      |      |                      |                      |       |       |                      |                      |
| After photocatalysis (without O <sub>2</sub> )          | 7.60 | 4.65 | ---  | 0.14                 | 0.08 | 11.52                | 10.44                | 28.31 | 31.73 | 0.16                 | 5.37                 |
| After photocatalysis (with O <sub>2</sub> )             | 3.74 | 0.87 | 0.40 | 0.10                 | 0.09 | 12.29                | 11.60                | 29.87 | 35.48 | 0.23                 | 5.32                 |

\* P1: Peak 1

\*\*HBP: High binding peak. LBP: Low binding peak

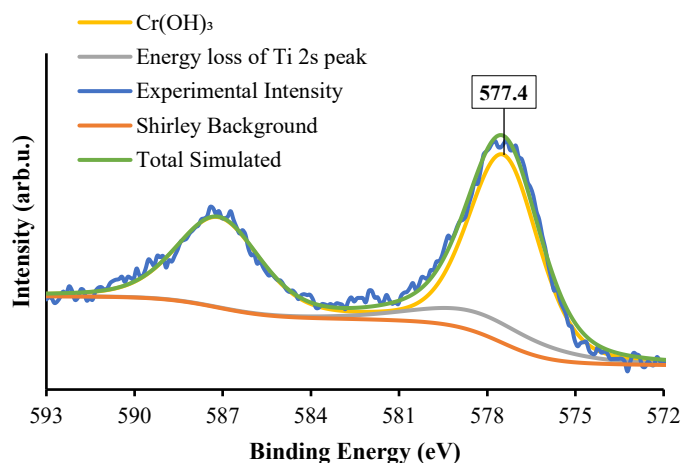

**Figure S7:** XPS spectrum of Cr 2p of SrTiO<sub>3</sub>-Au<sub>9</sub>-Cr(OH)<sub>3</sub> after 7 h irradiation.

HAADF-STEM images of SrTiO<sub>3</sub>-Au<sub>9</sub> and of SrTiO<sub>3</sub>-Au<sub>9</sub>-Cr(OH)<sub>3</sub> before heating and after 7 h irradiation are presented in Figure S8 for comparison. As shown in the images, the size of the Au clusters increases up to 8 nm for SrTiO<sub>3</sub>-Au<sub>9</sub> after 7 h irradiation due to the aggregation of Au clusters under the ultraviolet (UV) irradiation<sup>2</sup>. However, in terms of SrTiO<sub>3</sub>-Au<sub>9</sub>-Cr(OH)<sub>3</sub>, the Au clusters remain more stable on the surface of SrTiO<sub>3</sub> after 7 h irradiation, up to 2.7 nm.

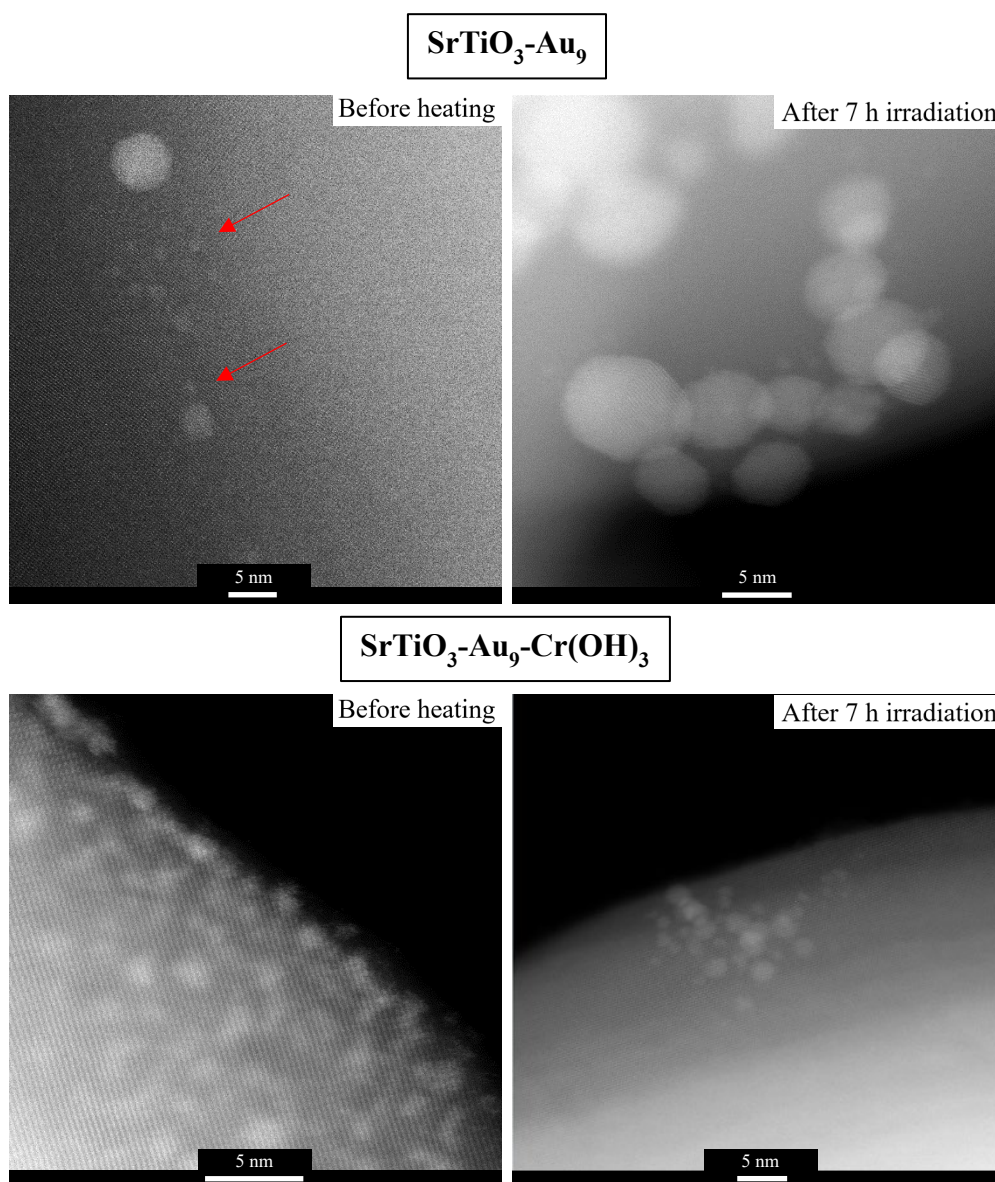

**Figure S8:** HAADF-STEM images of SrTiO<sub>3</sub>-Au<sub>9</sub> and SrTiO<sub>3</sub>-Au<sub>9</sub>-Cr(OH)<sub>3</sub> before heating and after 7 h irradiation.

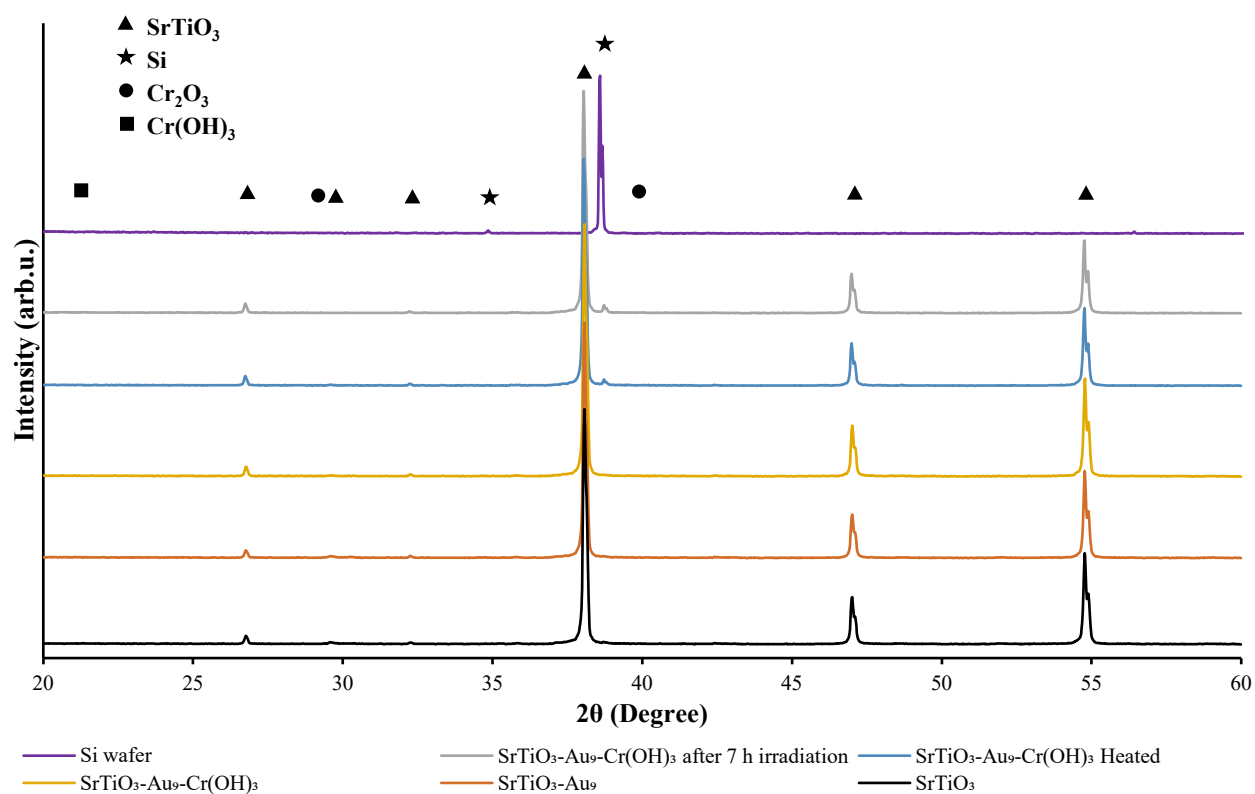

**Figure S9** : X-ray diffraction pattern of Si wafer,  $\text{SrTiO}_3$ ,  $\text{SrTiO}_3\text{-Au}_9$ ,  $\text{SrTiO}_3\text{-Au}_9\text{-Cr(OH)}_3$ ,  $\text{SrTiO}_3\text{-Au}_9\text{-Cr}_2\text{O}_3$  heated and  $\text{SrTiO}_3\text{-Au}_9\text{-Cr(OH)}_3$  after 7 h irradiation.

## REFERENCES

1. W. Kurashige, R. Kumazawa, D. Ishii, R. Hayashi, Y. Niihori, S. Hossain, L. V. Nair, T. Takayama, A. Iwase, S. Yamazoe, T. Tsukuda, A. Kudo and Y. Negishi, *The Journal of Physical Chemistry C*, 2018, **122**, 13669-13681.
2. J.-Y. Ruzicka, F. Abu Bakar, C. Hoeck, R. Adnan, C. McNicoll, T. Kemmitt, B. C. Cowie, G. F. Metha, G. G. Andersson and V. B. Golovko, *The Journal of Physical Chemistry C*, 2015, **119**, 24465-24474.
